# Supplementary material for: What If Root Nodules Are a Guesthouse for a Microbiome? The Case Study of Acacia longifolia
Source: MDPI journal article supplement (doi:10.3390/biology12091168), 2023-08-24
Supplement: s1 [file s1]

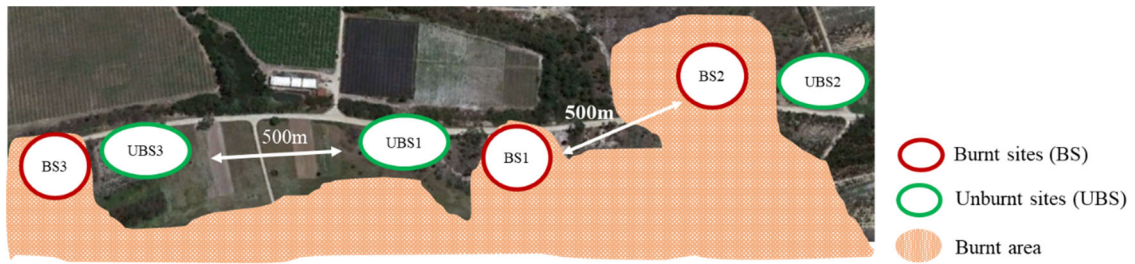

**Figure S1.** Schematic drawing of the sampling area including burnt area and the three unburnt and burnt sites.

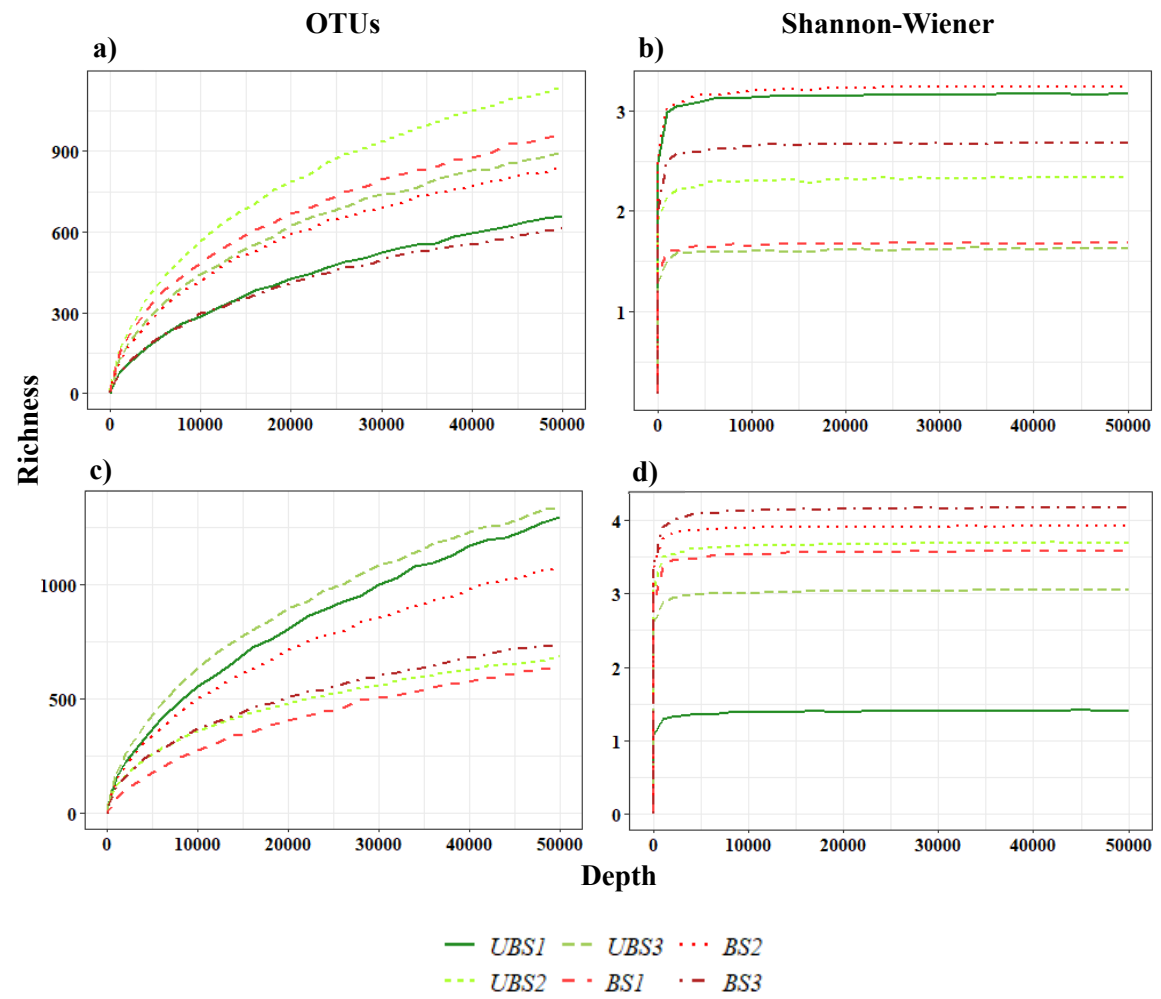

**Figure S2.** Rarefaction curves using the observed operational taxonomic units (OTUs) (a and c) and Shannon-Wiener index (b, d) from the three unburnt (UB) and three burnt (B) sites, for bacteria (a, b) and fungi (c, d).

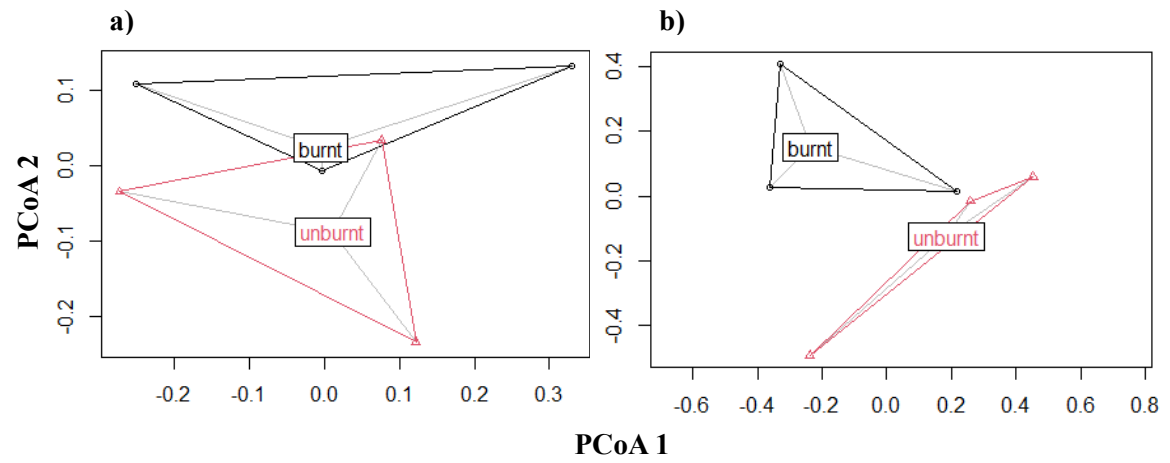

**Figure S3.** Beta diversity using Bray-Curtis dissimilarity of bacterial (a) and fungal (b) communities in each site considering the three plots using the observed operational taxonomic units (OTUs) abundance.
